# Supplementary material for: 3D-printed resin for permanent/definitive restorations: meta-analysis for bond strength
Source: PeerJ journal article supplement (doi:10.7717/peerj-matsci.35), 2025-05-20
Supplement: Rationale.docx [file Rationale.docx]

1. The rationale for conducting the systematic review / meta-analysis;

- 3D printed resins were recently approved (2023) for permanent dental restorations, but their bonding characteristics are not well understood
- Traditional adhesive protocols may not work well due to the unique layer-by-layer fabrication process and material composition
- There's an urgent need to understand bonding performance of new high-filler content resins approved for permanent restorations
- Long-term stability of adhesive bonds remains uncertain in the oral environment.

1. The contribution that it makes to knowledge in light of previously published related reports, including other meta-analyses and systematic reviews;

- First meta-analysis, specifically focused on bond strength of 3D printed permanent dental restorations
- Synthesizes very recent evidence (2023-2024) capturing the latest developments in this rapidly evolving field
- Identifies optimal surface treatment protocols, particularly for airborne-particle abrasion
- Provides evidence-based guidance for clinical protocols while highlighting areas needing further research
